# Supplementary material for: Improved functionality of graphene and carbon nanotube hybrid foam architecture by UV-ozone treatment
Source: Royal Society of Chemistry journal article supplement (doi:10.1039/c4nr06795a), 2015-01-01
Supplement: c4nr06795a1.pdf [file c4nr06795a1.pdf]

Supporting Information for

## Improved Functionality of Graphene and Carbon Nanotube Hybrid Foam Architecture by UV-ozone Treatment

Wei Wang,<sup>a,b</sup> Isaac Ruiz,<sup>b</sup> Ilkeun Lee,<sup>c</sup> Francisco Zaera,<sup>c</sup> Mihrimah Ozkan<sup>b</sup> and Cengiz Ozkan<sup>\*a,b</sup>

<sup>a</sup> Program of Materials Science and Engineering, Department of Mechanical Engineering, University of California, Riverside, CA, USA. E-mail: cozkan@engr.ucr.edu;

<sup>b</sup> Department of Electrical Engineering, University of California, Riverside, CA, USA. E-mail: mihri@ee.ucr.edu;

Keywords: UV-ozone, carbon, graphene, CNT, functionalization, SC;

15

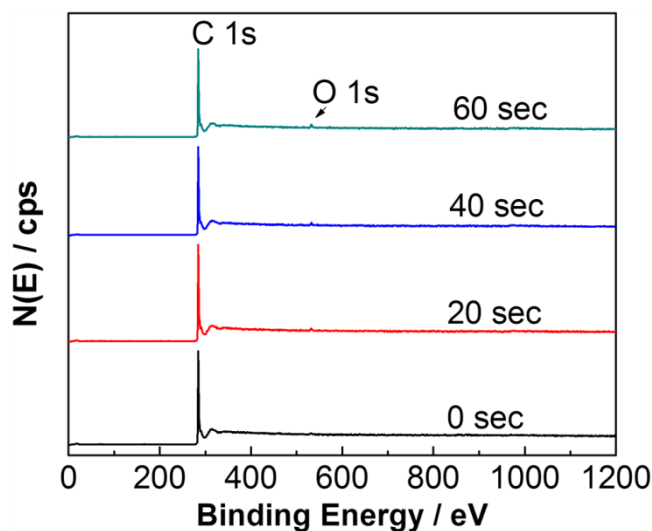

**Fig. S1.** XPS survey spectra of GM foam before and after (20sec, 40 sec, 60 sec) UV-ozone treatment.

20

**Table S1.** IR peak assignments.

| IR peaks | Assignments                                                                              |
|----------|------------------------------------------------------------------------------------------|
| ~1070    | $\nu(\text{C-OH})$ <sup>46</sup>                                                         |
| 1182     | $\nu(\text{C-O})$ , carboxyl monomer <sup>33, 35, 47, 48</sup>                           |
| 1259     | $\nu(\text{C-O})$ , carboxyl dimer <sup>46</sup> , or $\delta(\text{O-H})$ <sup>49</sup> |
| 1379     | $\delta(\text{O-H})$ <sup>35, 46, 50</sup>                                               |
| 1464     | $\nu_{\text{as}}(\text{CH}_3)$ <sup>49</sup>                                             |
| 1512     | $\nu(\text{C=C})$ <sup>47</sup>                                                          |
| 1585     | $\nu(\text{C=C})$ <sup>35, 51</sup>                                                      |
| 1610     | $\nu_{\text{as}}(\text{COO}^-)$ <sup>46</sup> or $\nu(\text{C=C})$ <sup>52</sup>         |
| 1713     | $\nu_{\text{as}}(\text{C=O})$ , carboxyl dimer <sup>32-35, 48</sup>                      |
| 1740     | $\nu_{\text{s}}(\text{C=O})$ , carboxyl monomer <sup>32, 34, 35, 48</sup>                |

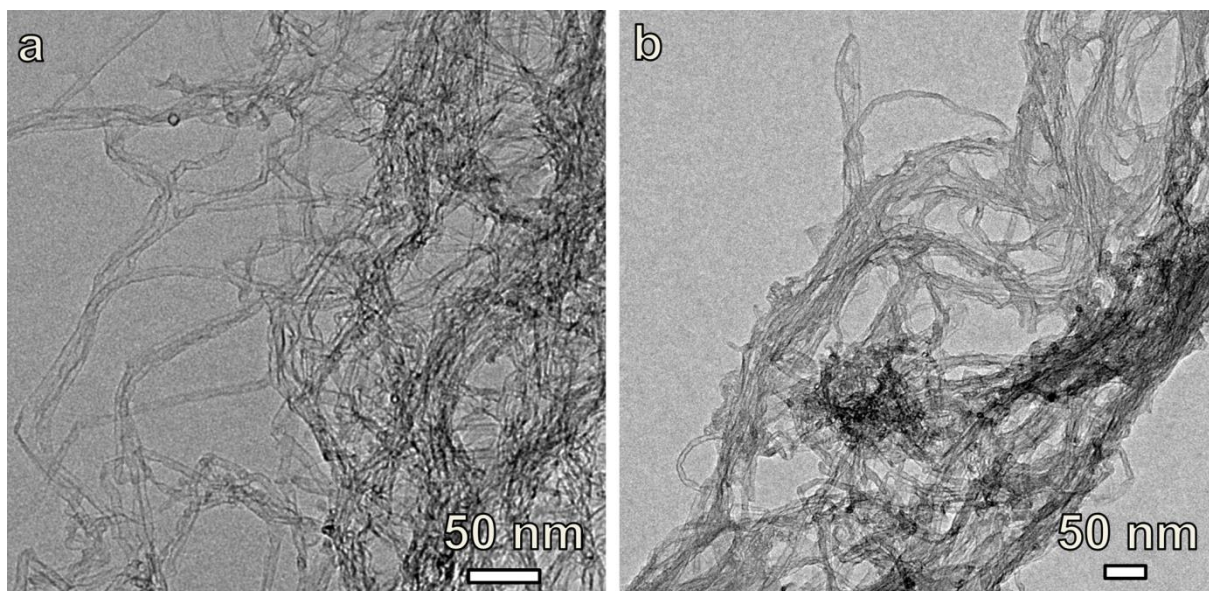

**Fig. S2.** TEM images of CNTs (a) before and (b) after 60 sec UV-ozone treatment.
